# Supplementary material for: Reliability of qualitative occlusal tooth wear evaluation using an intraoral scanner: A pilot study
Source: PLoS One. 2021 Mar 25;16(3):e0249119. doi: 10.1371/journal.pone.0249119 (PMC7993778; doi:10.1371/journal.pone.0249119)
Supplement: S1 File — (PDF) [file pone.0249119.s001.pdf]

**PARECER CONSUBSTANCIADO DO CEP**

**DADOS DO PROJETO DE PESQUISA**

**Título da Pesquisa:** Avaliação de desgaste dentário através de exame clínico, fotografias e escaneamento intraoral.

**Pesquisador:** Antonio David Corrêa Normando

**Área Temática:**

**Versão:** 1

**CAAE:** 63710916.5.0000.0018

**Instituição Proponente:** Instituto de Ciências da Saúde da Universidade Federal do Pará - ICS/ UFPA

**Patrocinador Principal:** Financiamento Próprio

**DADOS DO PARECER**

**Número do Parecer:** 1.996.860

**Apresentação do Projeto:**

O objetivo deste estudo é avaliar a presença e o nível de desgaste dentário, através de exame clínico convencional, imagens bidimensionais de fotografias intraorais e imagens tridimensionais geradas por um scanner intraoral. Para estimar o tamanho da amostra, será realizado um cálculo amostral. Serão selecionados indivíduos adultos, com idade entre 18 e 50 anos, de ambos os sexos. Os pacientes serão avaliados clinicamente buscando analisar o grau de desgaste presente nas superfícies oclusais de 2º pré-molar a 2º pré-molar dos arcos superior e inferior. O desgaste dentário também será avaliado nas imagens fotográficas intrabuciais de todos os pacientes, assim como nas imagens geradas pelo scanner intraoral. A avaliação da variável nas imagens obtidas por fotografias e escaneamento intraoral serão repetidas após 30 dias. A estatística não-paramétrica de

Friedman será empregada para verificar a diferença entre as amostras. O erro sistemático no exame do desgaste dentário será verificado através da análise comparativa das duas mensurações executadas nos diferentes tempos empregando-se, para isso, o teste Kappa Ponderado. Para avaliação da concordância entre os três métodos de avaliação do desgaste dentário, será aplicado o teste de Bland-Altman.

**Endereço:** Rua Augusto Corrêa nº 01-SI do ICS 13 - 2º and.

**Bairro:** Campus Universitário do Guamá

**CEP:** 66.075-110

**UF:** PA

**Município:** BELEM

**Telefone:** (91)3201-7735

**Fax:** (91)3201-8028

**E-mail:** cepccs@ufpa.br

Continuação do Parecer: 1.996.860

**Objetivo da Pesquisa:**

Objetivo Primário:

Avaliar a presença e o nível de desgaste dentário, através de exame clínico convencional, imagens bidimensionais de fotografias intraorais e imagens tridimensionais geradas por um scanner intraoral.

Objetivo Secundário:

1- Verificar se a avaliação de desgaste dental realizada por três métodos distintos: faz-se confiável em todos. 2- Comparar a replicabilidade e precisão dos métodos de avaliação do desgaste dentário, objetivando a validação do scanner intraoral como um novo método para avaliação desta desordem. 3- Analisar e comparar o tempo necessário para a realização de cada um dos métodos de avaliação utilizados no estudo.

**Avaliação dos Riscos e Benefícios:**

Riscos:

Os riscos decorrentes da participação na pesquisa são a quebra de sigilo das informações relativas aos participantes, caso estes dados sejam furtados. Nenhum risco de caráter psicológico.

Benefícios:

Os benefícios aos participantes da pesquisa serão a sua contribuição para a avaliação da confiabilidade e replicabilidade dos métodos de análise de desgaste dental, e na possível validação de um novo método para avaliação desta desordem bucal que, atualmente, atinge grande parte da população.

**Comentários e Considerações sobre a Pesquisa:**

O protocolo apresentado dispõe de metodologia e critérios definidos conforme resolução 466/12 do CNS/MS.

**Considerações sobre os Termos de apresentação obrigatória:**

Os termos apresentados contemplam os sugeridos pelo sistema CEP/CONEP.

**Conclusões ou Pendências e Lista de Inadequações:**

Diante do exposto somos pela aprovação do protocolo. Este é nosso parecer, SMJ.

**Considerações Finais a critério do CEP:**

**Este parecer foi elaborado baseado nos documentos abaixo relacionados:**

| Tipo Documento | Arquivo | Postagem | Autor | Situação |
|----------------|---------|----------|-------|----------|
|----------------|---------|----------|-------|----------|

**Endereço:** Rua Augusto Corrêa nº 01-SI do ICS 13 - 2º and.

**Bairro:** Campus Universitário do Guamá

**CEP:** 66.075-110

**UF:** PA

**Município:** BELEM

**Telefone:** (91)3201-7735

**Fax:** (91)3201-8028

**E-mail:** cepccs@ufpa.br

**UFPA - INSTITUTO DE  
CIÊNCIAS DA SAÚDE DA  
UNIVERSIDADE FEDERAL DO**

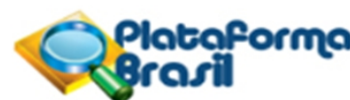

Continuação do Parecer: 1.996.860

|                                                           |                                              |                     |                               |        |
|-----------------------------------------------------------|----------------------------------------------|---------------------|-------------------------------|--------|
| Informações Básicas do Projeto                            | PB_INFORMAÇÕES_BÁSICAS_DO_PROJETO_626604.pdf | 09/01/2017 18:53:37 |                               | Aceito |
| Projeto Detalhado / Brochura Investigador                 | projeto_desgaste_dentario.docx               | 09/01/2017 18:52:17 | Antonio David Corrêa Normando | Aceito |
| Declaração de Pesquisadores                               | termo_compromisso_pesquisador.docx           | 09/01/2017 18:49:53 | Antonio David Corrêa Normando | Aceito |
| Outros                                                    | onus_financeiro.docx                         | 29/10/2016 21:34:48 | Antonio David Corrêa Normando | Aceito |
| TCLE / Termos de Assentimento / Justificativa de Ausência | TCLE.docx                                    | 27/06/2016 19:05:59 | Antonio David Corrêa Normando | Aceito |
| Declaração de Pesquisadores                               | termo_aceite_orientador.docx                 | 27/06/2016 18:37:44 | Antonio David Corrêa Normando | Aceito |
| Declaração de Pesquisadores                               | carta_encaminhamento_cep.docx                | 27/06/2016 18:37:14 | Antonio David Corrêa Normando | Aceito |
| Declaração de Instituição e Infraestrutura                | termo_consentimento_instituicao.docx         | 27/06/2016 18:34:51 | Antonio David Corrêa Normando | Aceito |
| Folha de Rosto                                            | folha_rosto.docx                             | 27/06/2016 18:29:26 | Antonio David Corrêa Normando | Aceito |

**Situação do Parecer:**

Aprovado

**Necessita Apreciação da CONEP:**

Não

BELEM, 03 de Abril de 2017

---

**Assinado por:  
Wallace Raimundo Araujo dos Santos  
(Coordenador)**

**Endereço:** Rua Augusto Corrêa nº 01-SI do ICS 13 - 2º and.

**Bairro:** Campus Universitário do Guamá **CEP:** 66.075-110

**UF:** PA **Município:** BELEM

**Telefone:** (91)3201-7735 **Fax:** (91)3201-8028 **E-mail:** cepccs@ufpa.br
